# Supplementary material for: New Insights on Heme Uptake in Leishmania spp
Source: MDPI journal article supplement (doi:10.3390/ijms231810501), 2022-09-10
Supplement: s1 [file s1]

## Supporting information

**Supplementary Figure S1.** *Emission spectrum of ZnMP as a function of pH.* The emission spectrum was obtained after excitation at 405 nm of a 10  $\mu$ M solution of ZnMP at different pH.

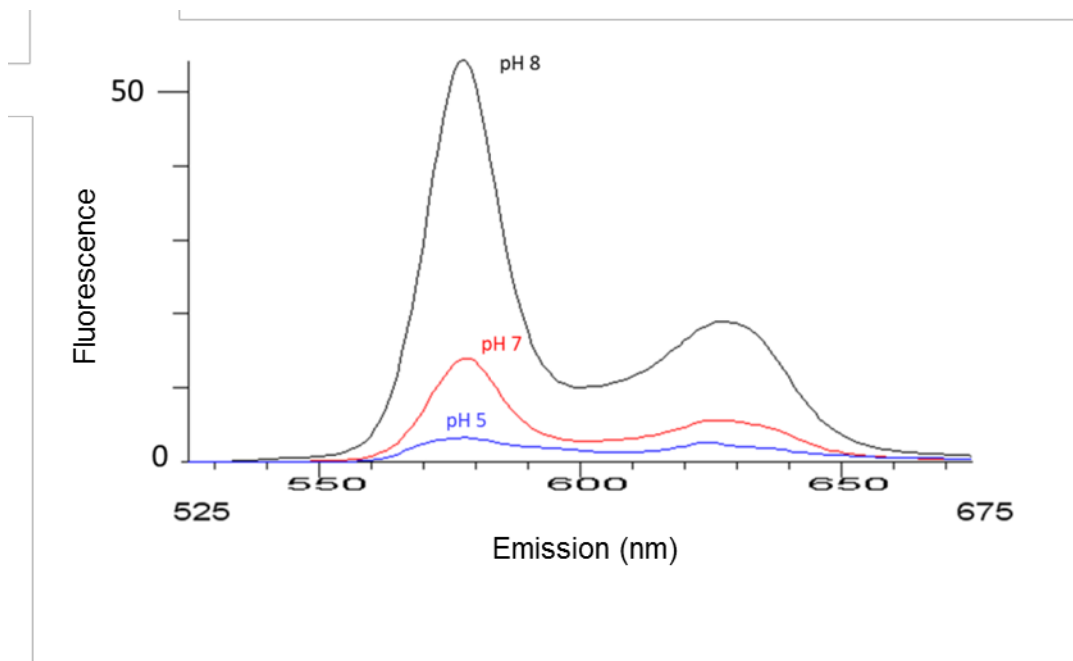

**Supplementary Table S1.** Oligonucleotides used.

| Primer sequence        | Application                                                              |
|------------------------|--------------------------------------------------------------------------|
| TCTTGGTGACGCCGCAGTA    | Forward primer to amplify <i>LHR1</i> from cDNA in <i>L. major</i>       |
| GCCATCCACACGCCAGTC     | Reverse primer to amplify <i>LHR1</i> from cDNA in <i>L. major</i>       |
| TTTTGGTGCTGCCGATTGTG   | Forward primer to amplify <i>LFLVCRB</i> from cDNA in <i>L. major</i>    |
| CACTGCGGACACGATAAGG    | Reverse primer to amplify <i>LFLVCRB</i> from cDNA in <i>L. major</i>    |
| GCGGTGACGAGATGTTGACG   | Forward primer to amplify <i>04.0930</i> from cDNA in <i>L. major</i>    |
| GATTCCAGAAGCGGTGGCAG   | Reverse primer to amplify <i>04.0930</i> from cDNA in <i>L. major</i>    |
| TGAACGAGTTGGAGCGGAAG   | Forward primer to amplify <i>LHR1</i> from cDNA in <i>L. donovani</i>    |
| CAACAGAATCACGACGACGAAG | Reverse primer to amplify <i>LHR1</i> from cDNA in <i>L. donovani</i>    |
| TTTTGGTGCTGCCGATTGTG   | Forward primer to amplify <i>LFLVCRB</i> from cDNA in <i>L. donovani</i> |
| CACTGCGGACACGAGAAGG    | Reverse primer to amplify <i>LFLVCRB</i> from cDNA in <i>L. donovani</i> |
| GCGGTGACGAGATGTTGACG   | Forward primer to amplify <i>04.0930</i> from cDNA in <i>L. donovani</i> |
| GATTCCAGAAGCGGTGGCAG   | Reverse primer to amplify <i>04.0930</i> from cDNA in <i>L. donovani</i> |
| TCTTTCTTTGCGCTTGCCTG   | Forward primer to amplify <i>LHR1</i> from cDNA in <i>L. mexicana</i>    |
| CGTCCTCTTCGAGTGTGTCC   | Reverse primer to amplify <i>LHR1</i> from cDNA in <i>L. mexicana</i>    |
| TTTTGGTGCTGCCGATTGTG   | Forward primer to amplify <i>LFLVCRB</i> from cDNA in <i>L. mexicana</i> |
| CACTGCGGACACGATAAGG    | Reverse primer to amplify <i>LFLVCRB</i> from cDNA in <i>L. mexicana</i> |
| GCGGTGACGAGATGATGACG   | Forward primer to amplify <i>04.0930</i> from cDNA in <i>L. mexicana</i> |
| TGTGACGCACGACGCACTCT   | Reverse primer to amplify <i>04.0930</i> from cDNA in <i>L. mexicana</i> |
| TGAACGAGTTGGAGCGGAAG   | Forward primer to amplify <i>LHR1</i> from cDNA in <i>L. infantum</i>    |
| CAACAGAATCACGACGACGAAG | Reverse primer to amplify <i>LHR1</i> from cDNA in <i>L. infantum</i>    |

| Primer sequence        | Application                                                                |
|------------------------|----------------------------------------------------------------------------|
| TTGTGGTGCTGCCGATTGTG   | Forward primer to amplify <i>LFLVCRB</i> from cDNA in <i>L. infantum</i>   |
| CACTGCGGACACGAGAAGG    | Reverse primer to amplify <i>LFLVCRB</i> from cDNA in <i>L. infantum</i>   |
| GCGGTGACGAGATGTTGACG   | Forward primer to amplify <i>04.0930</i> from cDNA in <i>L. infantum</i>   |
| GATTCCAGAAGCGGTGGCAG   | Reverse primer to amplify <i>04.0930</i> from cDNA in <i>L. infantum</i>   |
| CTTCGCGGTTCTCTTAATCG   | Forward primer to amplify <i>LHR1</i> from cDNA in <i>L. panamensis</i>    |
| TTCGCTGTCCAGACTTGATG   | Reverse primer to amplify <i>LHR1</i> from cDNA in <i>L. panamensis</i>    |
| TACAAGAGCGAGAGAGGCAG   | Forward primer to amplify <i>LFLVCRB</i> from cDNA in <i>L. panamensis</i> |
| ACAATAACGAAGCGAAACGG   | Reverse primer to amplify <i>LFLVCRB</i> from cDNA in <i>L. panamensis</i> |
| GCGGGGATGAGATGATGACG   | Forward primer to amplify <i>04.0930</i> from cDNA in <i>L. panamensis</i> |
| GATTCCAGAAGCGGTGGCAG   | Reverse primer to amplify <i>04.0930</i> from cDNA in <i>L. panamensis</i> |
| GCATTAGTATCGCCAGTCC    | Forward primer to amplify <i>LHR1</i> from cDNA in <i>L. tarentolae</i>    |
| CGCCACTTCATTGCTGCC     | Reverse primer to amplify <i>LHR1</i> from cDNA in <i>L. tarentolae</i>    |
| CCTCATCAAGGTATCCAGCAAC | Forward primer to amplify <i>LFLVCRB</i> from cDNA in <i>L. tarentolae</i> |
| CATCGCAGCCAGAACAATGG   | Reverse primer to amplify <i>LFLVCRB</i> from cDNA in <i>L. tarentolae</i> |
| AGGCATCACCGGCATGAGCG   | Forward primer to amplify <i>04.0930</i> from cDNA in <i>L. tarentolae</i> |
| CACGACGCACTCCCGCATGT   | Reverse primer to amplify <i>04.0930</i> from cDNA in <i>L. tarentolae</i> |

**Supplementary Table S2.** Accession number of the genes used.

|                      | <i>LHR1</i>    | <i>LFLVCRB</i> | Hypothetical protein |
|----------------------|----------------|----------------|----------------------|
| <i>L. major</i>      | LmjF.24.2230   | LmjF.17.1430   | LmjF.04.0930         |
| <i>L. donovani</i>   | LdBPK_242320.1 | LdBPK_171550.1 | LdBPK_040930.1       |
| <i>L. infantum</i>   | LINF_240028500 | LINF_170021800 | LINF_040014300       |
| <i>L. mexicana</i>   | Lmx.24.2230    | LmxM.17.1430   | LmxM.04.0930         |
| <i>L. tarentolae</i> | LtaP24.2390    | LtaP17.1570    | LtaP04.0900          |
